# Supplementary material
Source: Springer Nature journal article supplement (https://www.springermedizin.de/resource/supplementary/12889_2011_3264_MOESM2_ESM.pdf/9488616)

**Unintentional Injury**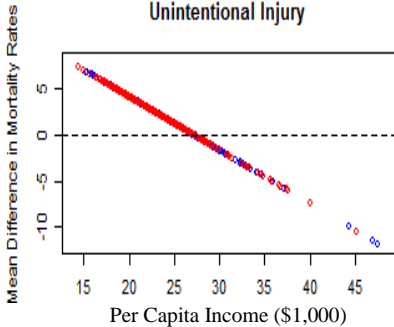**Lung and Bronchus Cancer**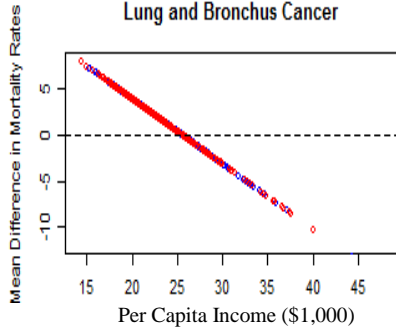**All Types of Cancer**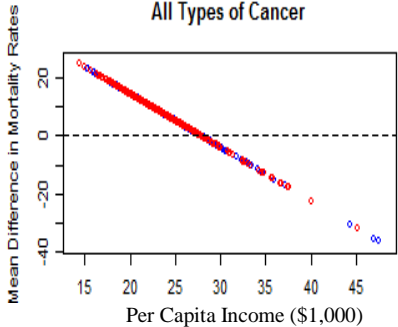**Diabetes**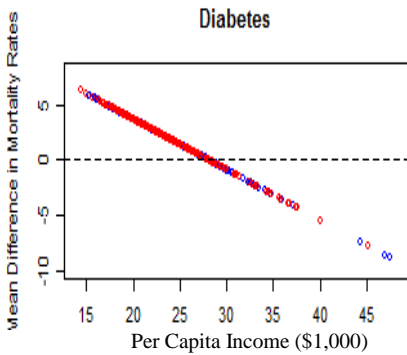**Chronic Lower Respiratory Disease**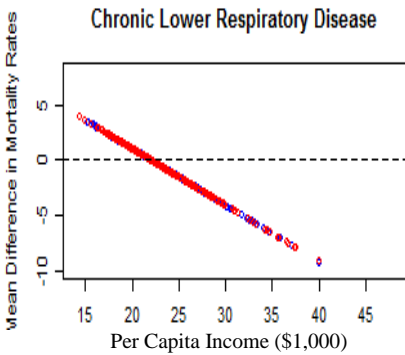

Supplement: MOESM2 [file 9488616]
